# Supplementary material for: Comparative study on formic acid sensing properties of flame-made Zn2SnO4 nanoparticles and its parent metal oxides
Source: Royal Society of Chemistry journal article supplement (doi:10.1039/d3cp00845b), 2023-01-01
Supplement: d3cp00845b1.pdf [file d3cp00845b1.pdf]

## Supporting Information (SI)

### Comparative study on formic acid sensing of flame-made $\text{Zn}_2\text{SnO}_4$ nanoparticles and its parent metal oxides

Matawee Punginsang<sup>a</sup>, Kanittha Inyawilert<sup>a</sup>, Mameaseng Siriwalai<sup>b,c,e</sup>,  
Anurat Wisitsoraat<sup>d</sup>, Adisorn Tuantranont<sup>d</sup>, Chaikarn Liewhiran<sup>a,e,\*</sup>

<sup>a</sup> Department of Physics and Materials Science, Faculty of Science, Chiang Mai University,  
Chiang Mai 50200, Thailand

<sup>b</sup> Ph.D. Program in Nanoscience and Nanotechnology (International  
Program/Interdisciplinary), Faculty of Science, Chiang Mai University, Chiang Mai, 50200,  
Thailand

<sup>c</sup> Graduate School, Chiang Mai University, Chiang Mai, 50200, Thailand

<sup>d</sup> National Security and Dual-Use Technology Center, National Science and Technology  
Development Agency (NSTDA), Klong Luang, Phatum Thani 12120, Thailand

<sup>e</sup> Center of Excellence in Materials Science and Technology, Chiang Mai University, Chiang  
Mai 50200, Thailand

Tel+ :66-81-408-2324; Fax+ :66-53-892-271

\*Corresponding author's e-mail address: [cliewhiran@gmail.com](mailto:cliewhiran@gmail.com)

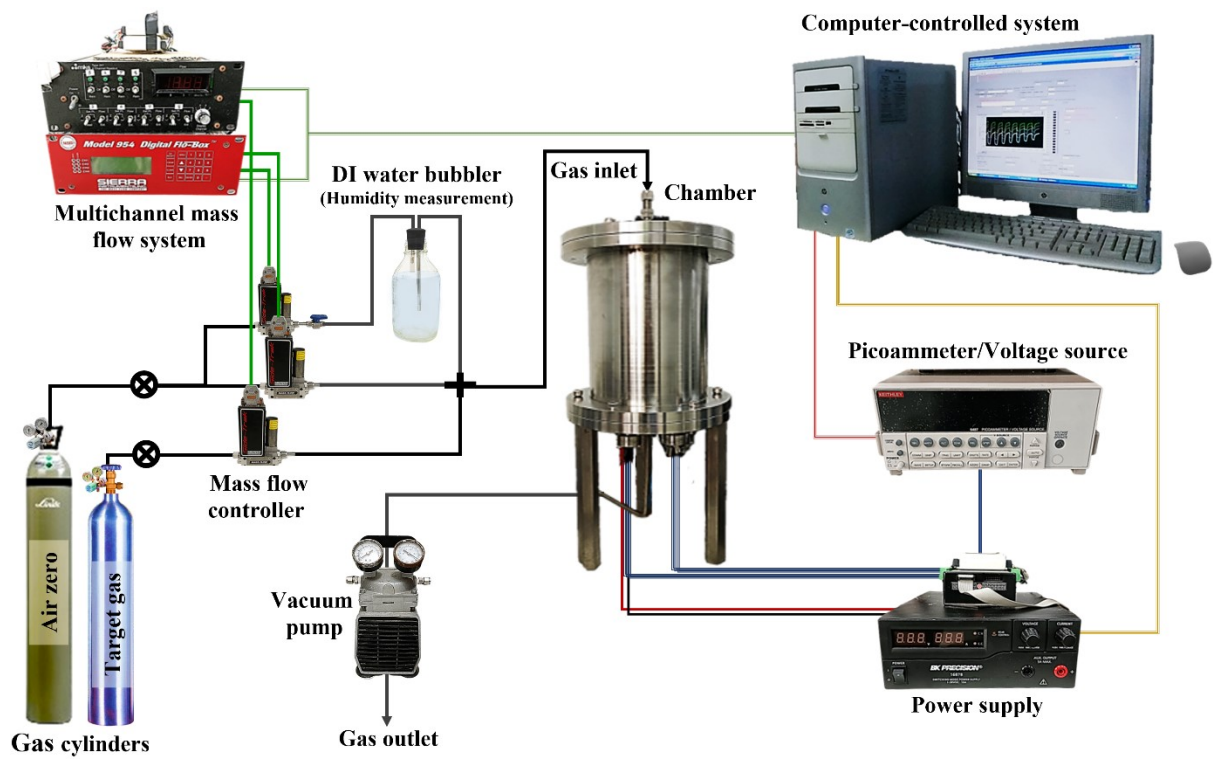

**Fig. S1.** Schematic diagram of gas sensor testing system.

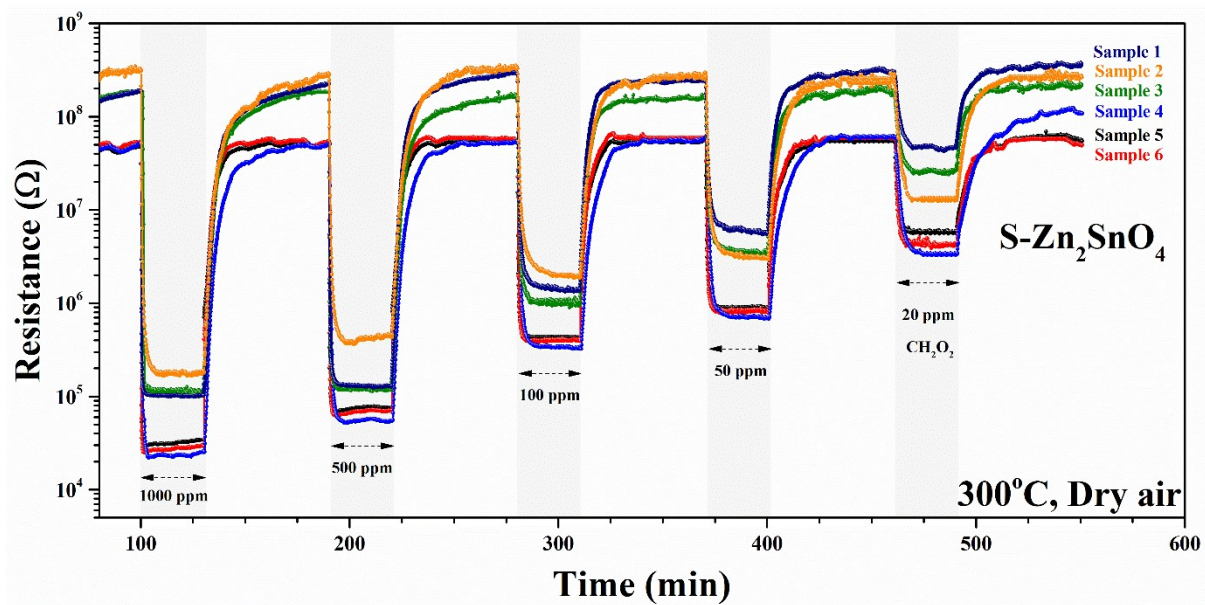

**Fig. S2.** the changes in resistance of six  $S-Zn_2SnO_4$  sensors fabricated in the same batch towards 20–1,000 ppm  $CH_2O_2$  at  $300^\circ\text{C}$ .

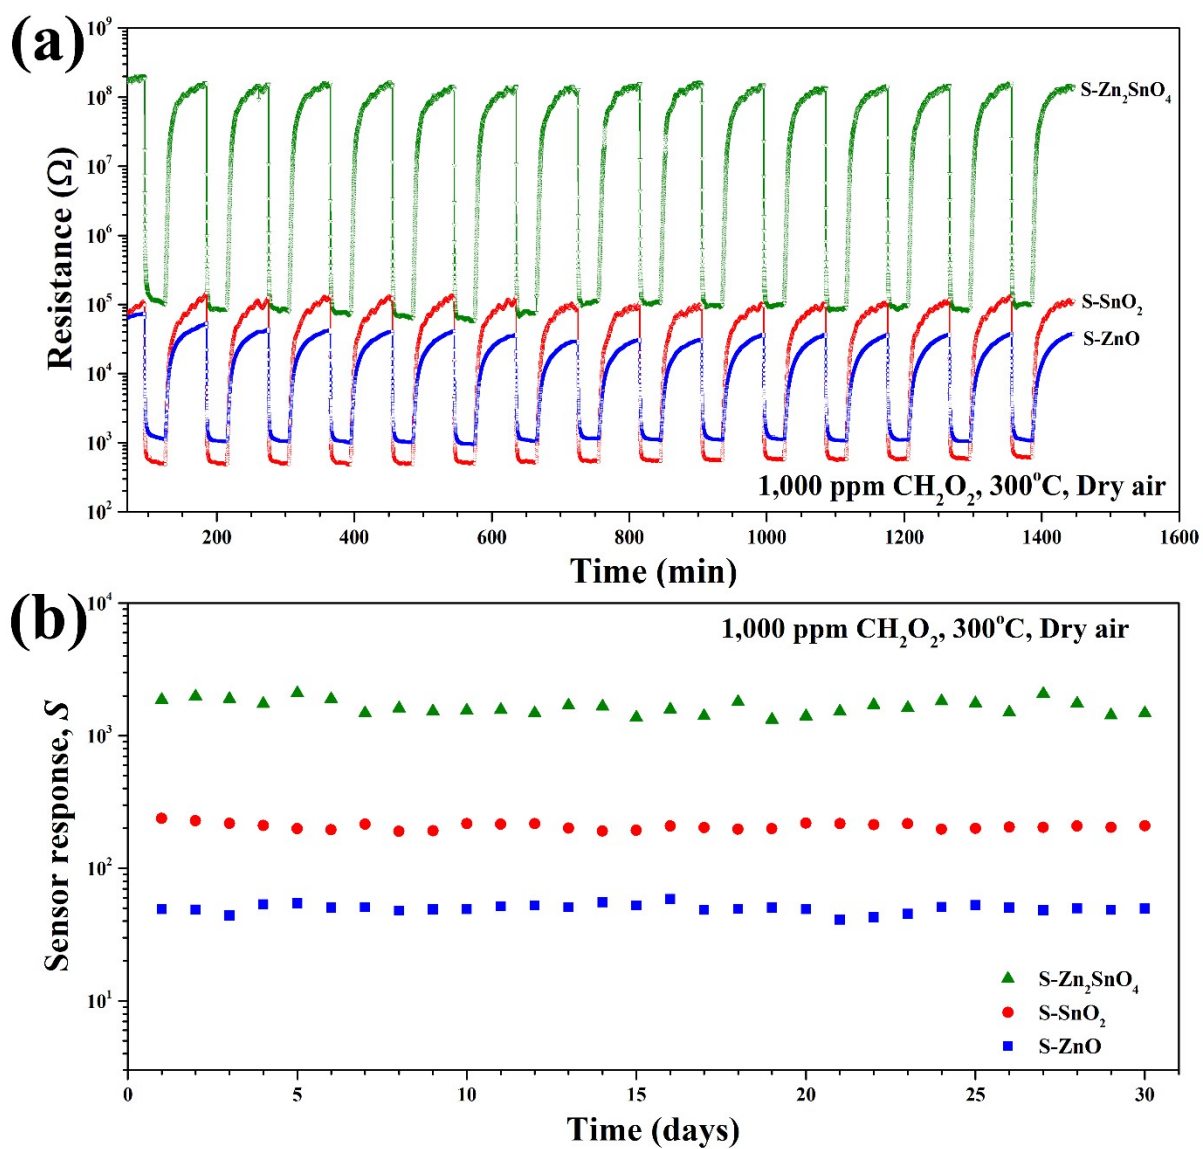

**Fig. S3.** (a) changes in resistance of S-Zn<sub>2</sub>SnO<sub>4</sub>, S-SnO<sub>2</sub>, and S-ZnO sensors towards fifteen consecutive pulses of 1,000 ppm formic acid (CH<sub>2</sub>O<sub>2</sub>) and (b) the corresponding sensor response under exposure 1,000 ppm CH<sub>2</sub>O<sub>2</sub> for consecutive 30 days at 300°C.
